# Supplementary material
Source: ML conference proceedings conference paper supplement (https://openaccess.thecvf.com/content/CVPR2026/html/Yu_OmniFood8K_Single-Image_Nutrition_CVPR_2026_paper.html)
Supplement: Supplementary file 1 [file Yu_OmniFood8K_Single-Image_Nutrition_CVPR_2026_supplemental.pdf]

# Supplementary of OmniFood8K: Single-Image Nutrition Estimation via Hierarchical Frequency-Aligned Fusion

Dongjian Yu<sup>1</sup> Weiqing Min<sup>2,3</sup> Qian Jiang<sup>1</sup> Xing Lin<sup>1</sup> Xin Jin<sup>1\*</sup> Shuqiang Jiang<sup>2,3</sup>

<sup>1</sup>School of Software, Yunnan University, China <sup>2</sup>State Key Laboratory of AI Safety, Institute of Computing Technology, Chinese Academy of Sciences, China

<sup>3</sup>University of Chinese Academy of Sciences, China

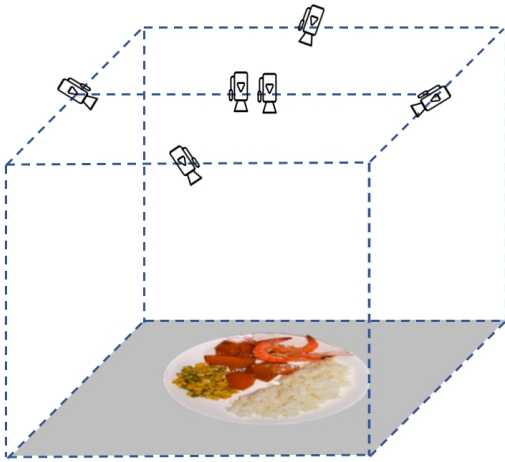

Figure 1. The six cameras used to capture multi-view images of the food.

## 1. Examples of the OmniFood8K dataset

The OmniFood8K dataset contains detailed information about various recipes and their corresponding cooking procedures. As shown in Figure 1, we use six cameras to simultaneously capture multi-view images of each food.

Figure 2 shows two examples from the OmniFood8K dataset, illustrating the preparation and weighing of ingredients for different foods. As shown in Tables 1 and 2, we present two recipe examples included in the OmniFood8K dataset: Scrambled Eggs with Tomatoes and Shredded Pork with Potatoes. Figures 3 and 4 show the key operation steps corresponding to each recipe. Figures 5, 6, 7, 8 and 9 illustrate several representative food scenes from the OmniFood8K dataset. Tables 3 and 4 list the names of the 165 food categories included in the OmniFood8K dataset.

---

\*Corresponding author

## 2. Hikvision DS-E14a camera

We capture six-view images of food using six Hikvision DS-E14a cameras, each a USB 2.0 plug-and-play device with a 4-megapixel CMOS sensor and a fixed 3.6 mm lens offering an 80° field of view. They support up to 2560 × 1440 resolution, are powered via USB (DC 5 V ± 5%), and work on Windows, macOS, Linux, and Android without extra drivers.

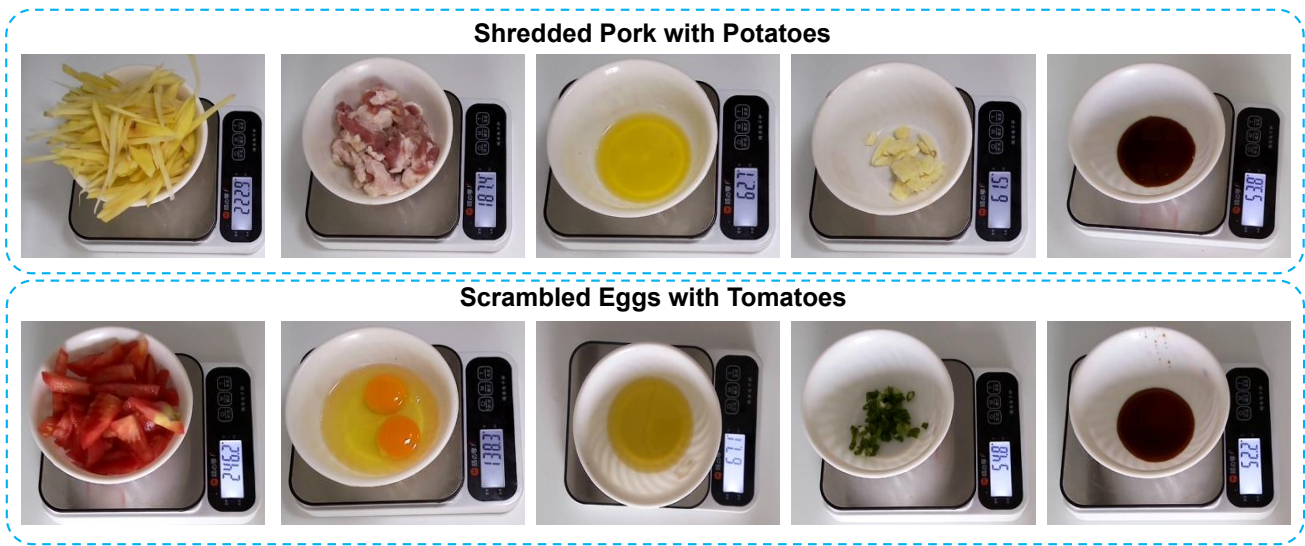

Figure 2. Examples of ingredient preparation and weighing from the OmniFood8K dataset. The displayed weights include the weight of the bowls.

Table 1. An example from the OmniFood8K dataset: the recipe of scrambled eggs with tomatoes.

| Step | Description                                                       |
|------|-------------------------------------------------------------------|
| 1    | Pour an appropriate amount of cooking oil into the pan.           |
| 2    | When the oil is hot, pour the beaten eggs evenly into the pan.    |
| 3    | Stir-fry gently to cook the eggs evenly on both sides.            |
| 4    | Once the eggs are cooked, remove them from the pan and set aside. |
| 5    | Add the diced tomatoes into the pan and stir-fry.                 |
| 6    | Add a small amount of water.                                      |
| 7    | Season with an appropriate amount of salt.                        |
| 8    | Return the cooked eggs to the pan.                                |
| 9    | Add light soy sauce and continue stir-frying.                     |
| 10   | Dish out and sprinkle with chopped scallions before serving.      |

Table 2. An example from the OmniFood8K dataset: the recipe of shredded pork with potatoes.

| Step | Description                                                                           |
|------|---------------------------------------------------------------------------------------|
| 1    | Heat the pan and add oil.                                                             |
| 2    | Add the shredded meat and stir-fry.                                                   |
| 3    | Add the garlic and stir-fry until it turns golden.                                    |
| 4    | Add the shredded potatoes and continue stir-frying.                                   |
| 5    | Add an appropriate amount of salt and continue stir-frying.                           |
| 6    | Add a suitable amount of soy sauce and stir-fry until done, then remove from the pan. |

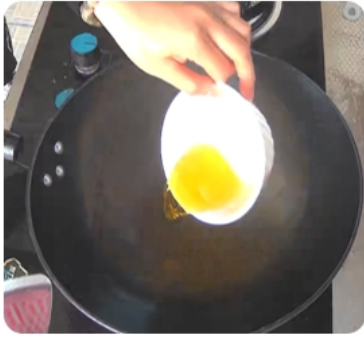

①

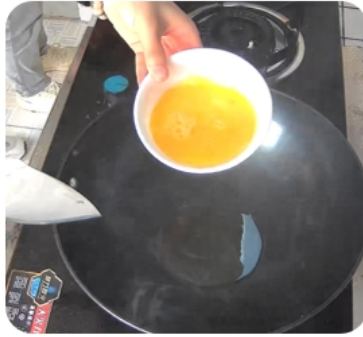

②

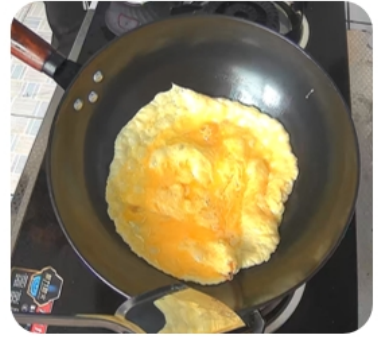

③

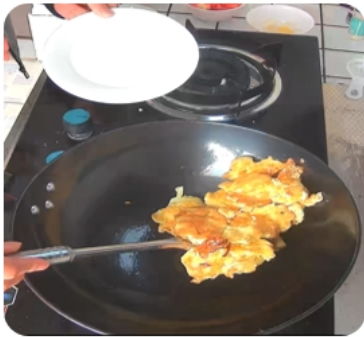

④

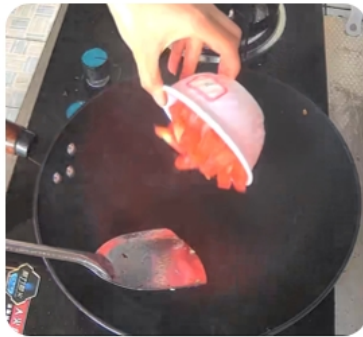

⑤

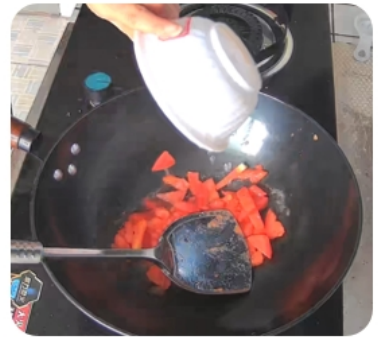

⑥

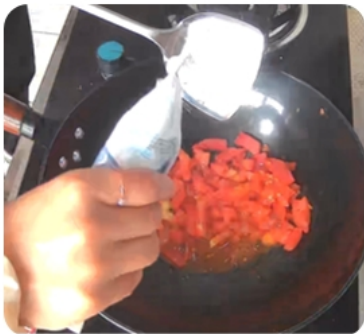

⑦

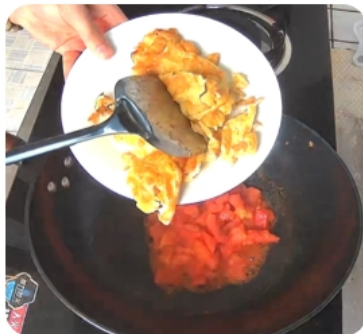

⑧

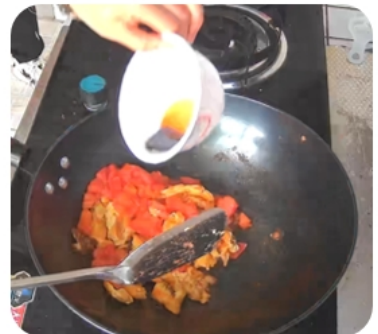

⑨

Figure 3. An example from OmniFood8K dataset: the cooking process of scrambled eggs with tomatoes.

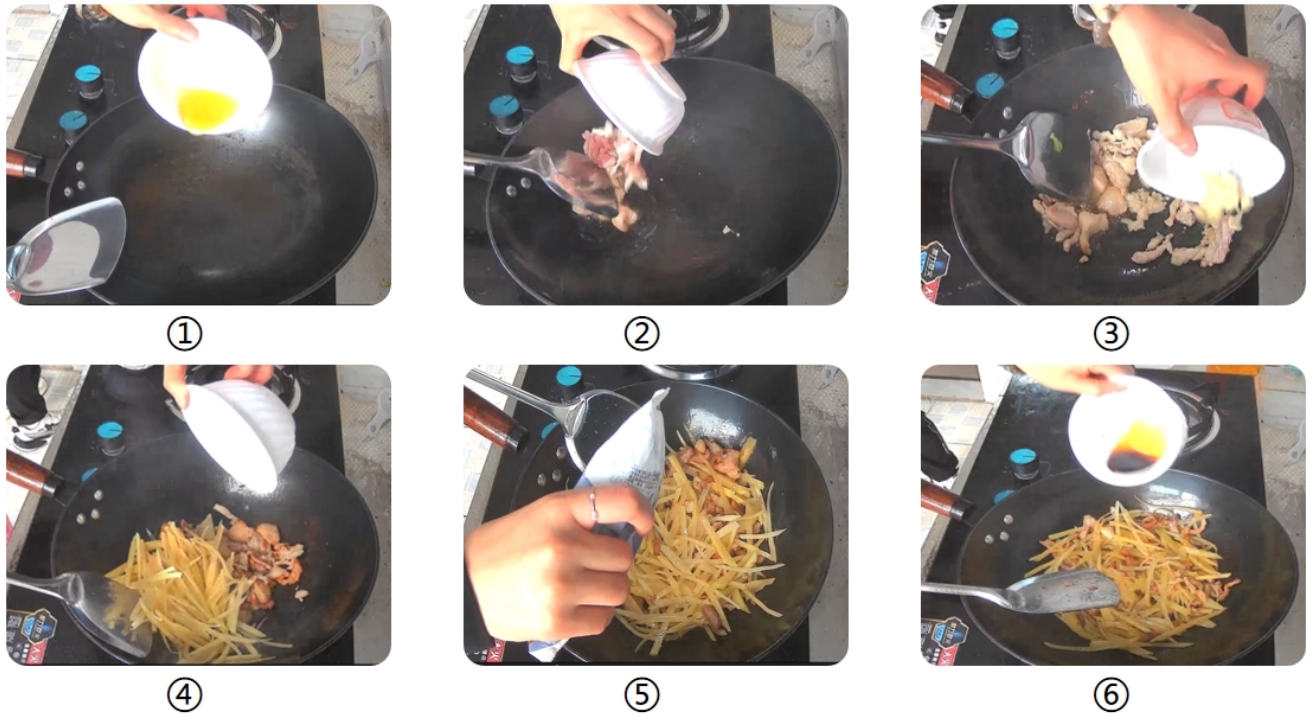

Figure 4. An example from OmniFood8K dataset: the cooking process of scrambled eggs with tomatoes.

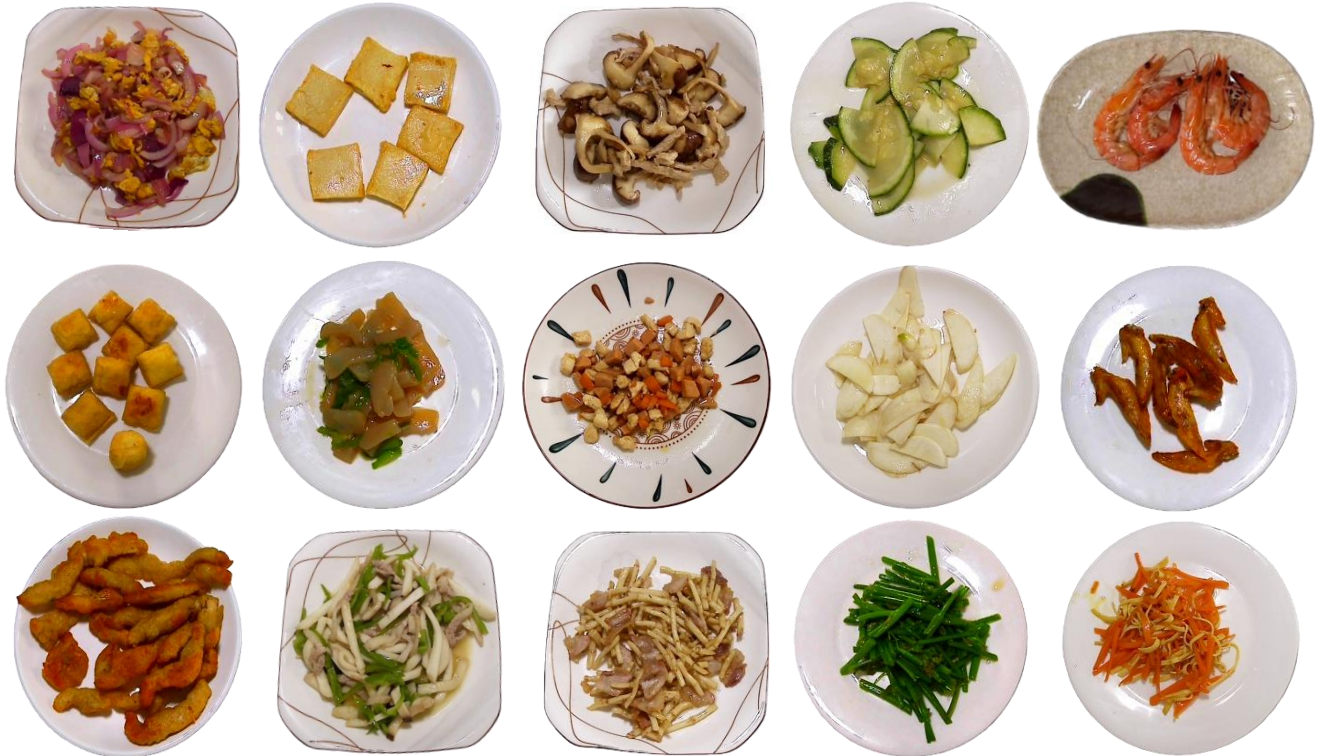

Figure 5. Representative food scene from the OmniFood8K dataset.

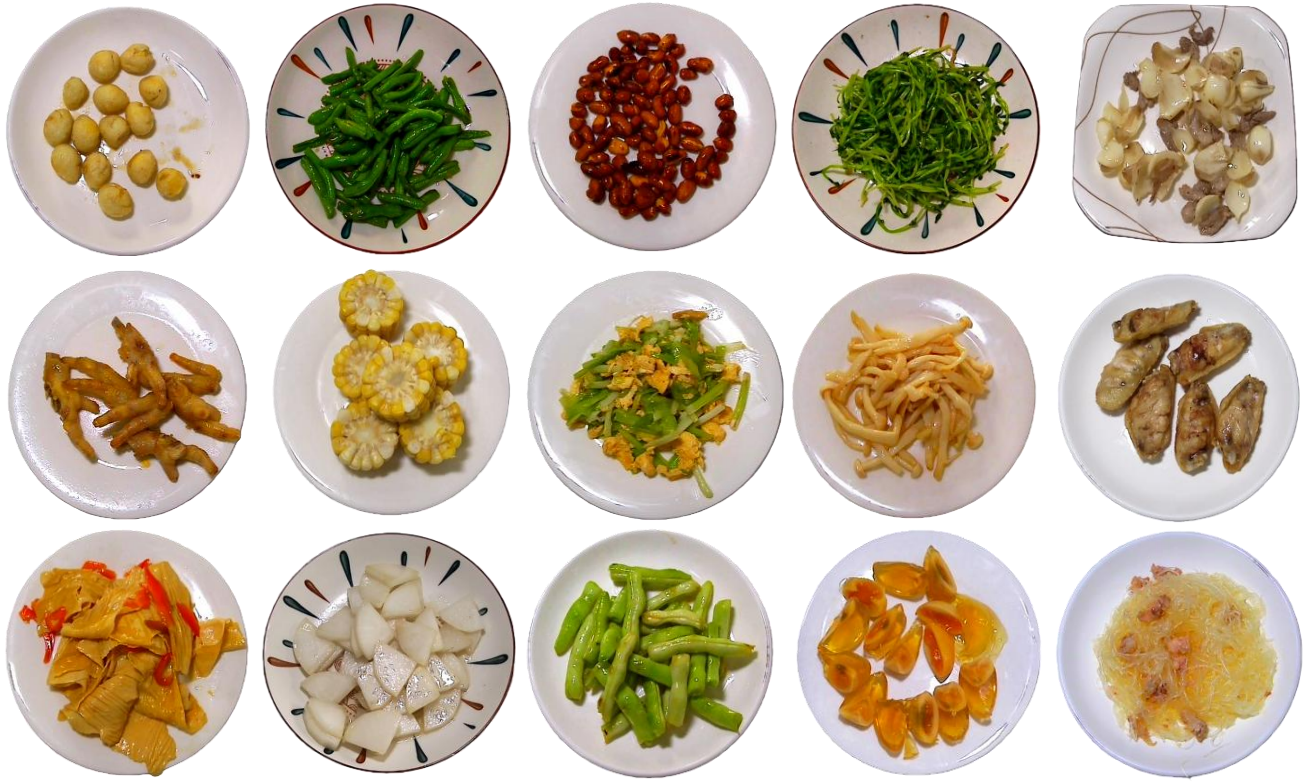

Figure 6. Representative food scene from the OmniFood8K dataset.

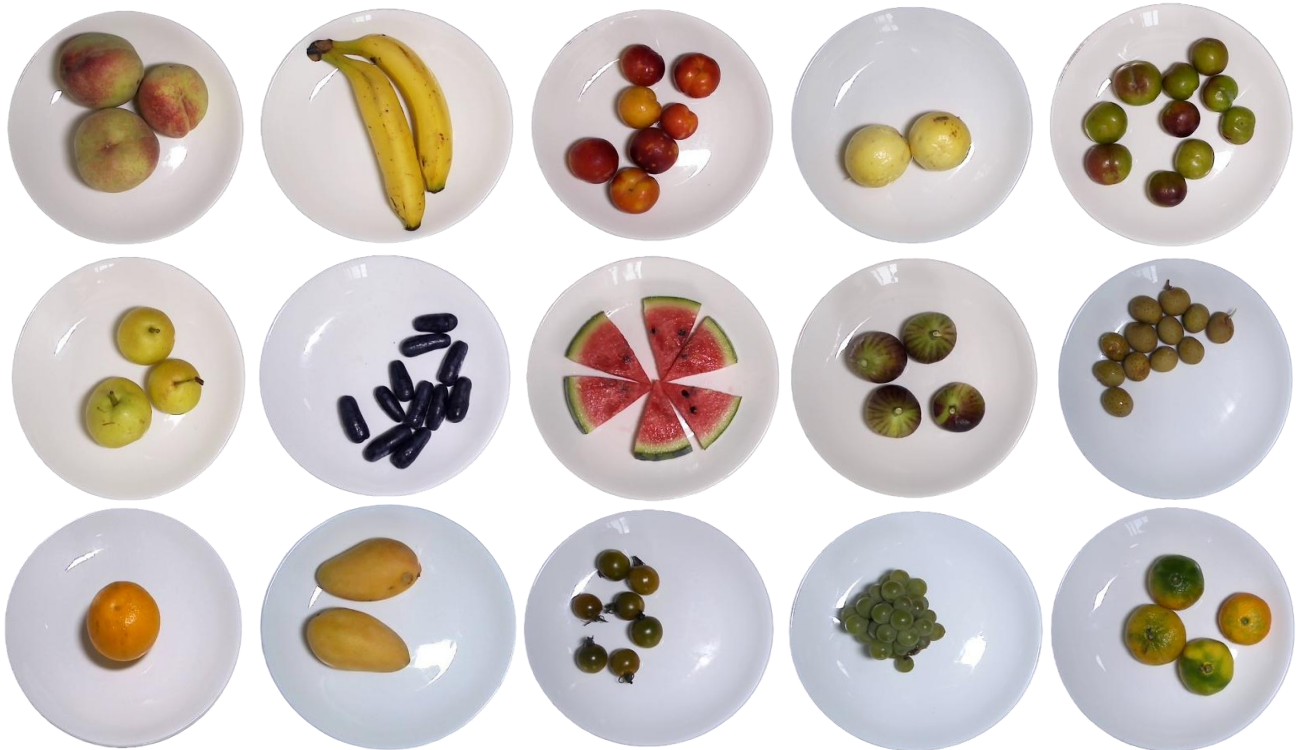

Figure 7. Representative food scene from the OmniFood8K dataset.

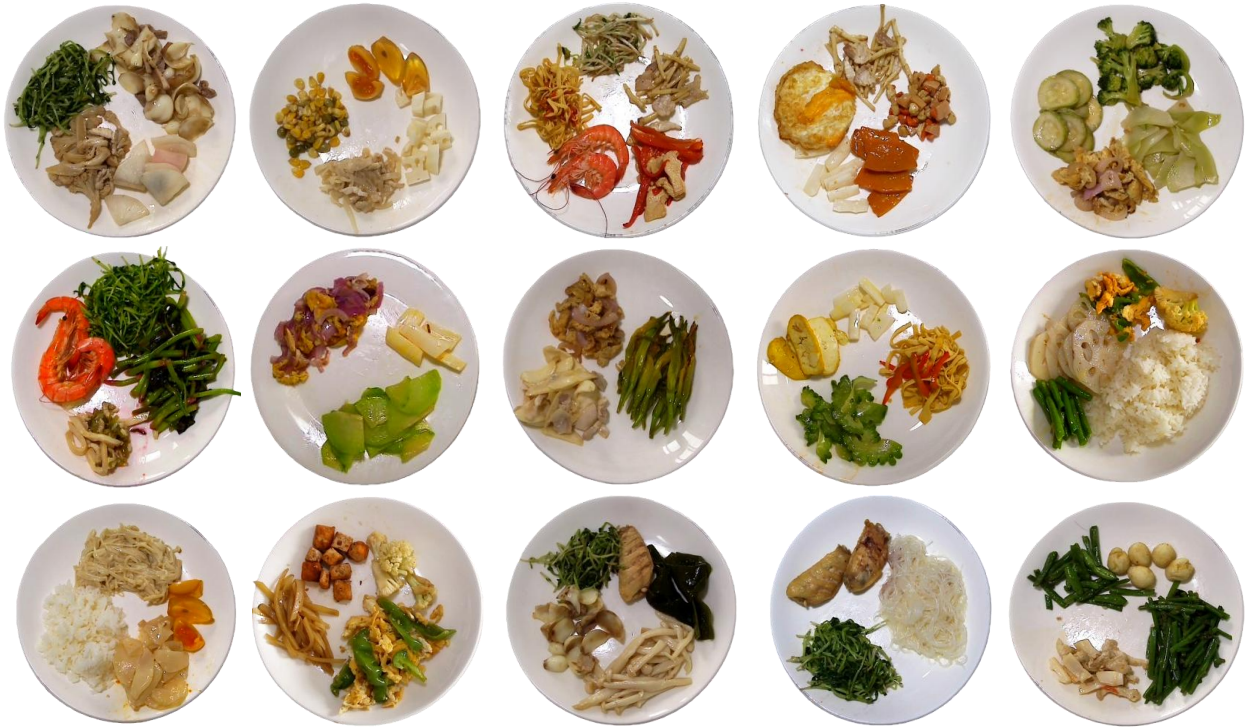

Figure 8. Representative food scene from the OmniFood8K dataset.

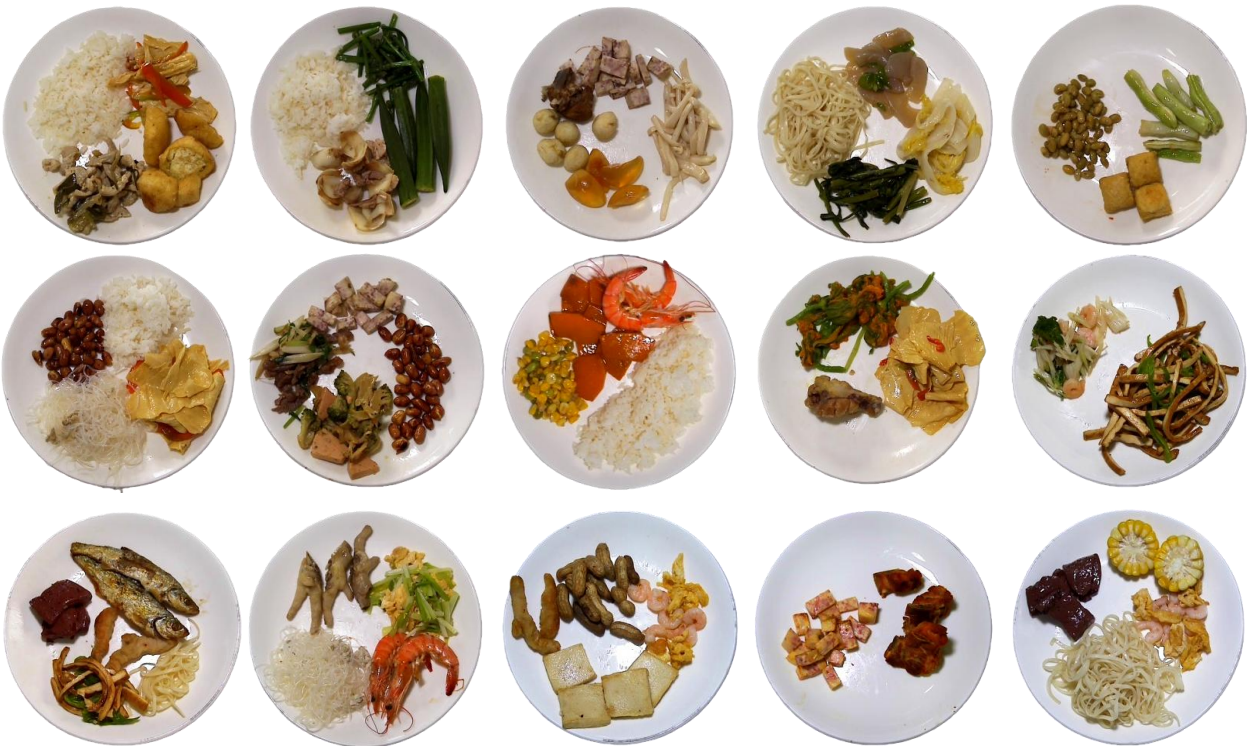

Figure 9. Representative food scene from the OmniFood8K dataset.

Table 3. Food Name List from the OmniFood8K Dataset

| <b>ID</b> | <b>Name</b>                        | <b>ID</b> | <b>Name</b>                       | <b>ID</b> | <b>Name</b>                        |
|-----------|------------------------------------|-----------|-----------------------------------|-----------|------------------------------------|
| 1         | Mapo Tofu                          | 2         | Green Pepper Tofu                 | 3         | Green Pepper Potato Slices         |
| 4         | Scallion Tofu                      | 5         | Scrambled Eggs with Tomato        | 6         | Green Pepper Sausage               |
| 7         | Green Pepper Shredded Potato       | 8         | Cucumber Egg                      | 9         | Cucumber Sausage                   |
| 10        | Vinegar Shredded Potato            | 11        | Stir-fried Green Pepper with Meat | 12        | Minced Meat with Eggplant          |
| 13        | Shredded Pork with Potatoes        | 14        | Green Pepper Eggplant             | 15        | Pan-Fried Eggs with Green Peppers  |
| 16        | Stir-fried Water Spinach           | 17        | Fried Egg                         | 18        | Egg Fried Rice                     |
| 19        | Cucumber Salad                     | 20        | Seaweed Egg Drop Soup             | 21        | Peas Stir-fried Corn               |
| 22        | Stir-fried Corn Kernels            | 23        | Stir-fried Carrot Slices          | 24        | Stir-fried Cauliflower             |
| 25        | Stir-fried Lotus Root Slices       | 26        | Stir-fried Green Beans            | 27        | Stir-fried Bean Sprouts            |
| 28        | Peas with Sausage                  | 29        | Stir-fried Lettuce                | 30        | Green Pepper Fried Egg             |
| 31        | Carrot Shredded Meat               | 32        | Boiled Peanuts                    | 33        | Stir-fried Garlic Stalks with Meat |
| 34        | Minced Meat with Corn Kernels      | 35        | Stir-fried Celery with Meat       | 36        | Stir-fried Yam                     |
| 37        | Stir-fried Eggs with Scallion      | 38        | Bitter Melon Fried Egg            | 39        | Stir-fried Bok Choy                |
| 40        | Stir-fried Shanghai Green          | 41        | Stir-fried Pork with Bean Pods    | 42        | Shiitake Mushrooms with Meat       |
| 43        | Leek Egg                           | 44        | Stir-fried Serrated Lettuce       | 45        | Stir-fried Lotus Root Cubes        |
| 46        | Stir-fried Garlic Sprout with Meat | 47        | Loofah Egg                        | 48        | Stir-fried Zucchini                |
| 49        | Stir-fried Edamame                 | 50        | Tomato Egg Soup                   | 51        | Stir-fried Bitter Melon            |
| 52        | Stir-fried Small Pumpkin Slices    | 53        | Pumpkin Shreds with Meat          | 54        | Stir-fried Firm Tofu               |
| 55        | Stir-fried Bamboo Shoots           | 56        | Bamboo Shoots with Meat           | 57        | Tofu Skin with Red Pepper          |
| 58        | Stir-fried Tomato                  | 59        | Stir-fried Leek                   | 60        | Stir-fried Green Beans with Meat   |
| 61        | Kung Pao Chicken                   | 62        | Cauliflower with Meat             | 63        | Loofah with Minced Meat            |
| 64        | Carrot Shreds with Tofu Skin       | 65        | Stir-fried Red Sausage            | 66        | Stir-fried Water Caltrop           |
| 67        | Stir-fried King Oyster Mushroom    | 68        | King Oyster Mushroom with Meat    | 69        | Stir-fried Gourd                   |
| 70        | Gourd with Meat                    | 71        | Stir-fried Okra                   | 72        | Green Pepper Red Sausage           |
| 73        | Toona Fried Egg                    | 74        | Onion Fried Egg                   | 75        | Fennel Egg                         |
| 76        | Stir-fried Purple Cabbage          | 77        | Stir-fried Cabbage                | 78        | Stir-fried Lettuce Stem            |
| 79        | Lettuce with Meat                  | 80        | Minced Meat with Winter Melon     | 81        | Stir-fried Broccoli                |
| 82        | Stir-fried Daylily                 | 83        | Stir-fried Old Pumpkin Slices     | 84        | Stir-fried Clam                    |
| 85        | Steamed Prawns                     | 86        | Stir-fried Spinach                | 87        | Fish Mint with Meat                |
| 88        | Red Pepper Chicken Breast          | 89        | Century Egg                       | 90        | Stir-fried Oyster Mushroom         |
| 91        | Stir-fried White Radish            | 92        | Broccoli with Sausage             | 93        | Stir-fried Enoki Mushroom          |
| 94        | Lily Bulb with Meat                | 95        | Stir-fried Shepherd's Purse       | 96        | Stir-fried Pea Sprouts             |
| 97        | Stir-fried Quail Eggs              | 98        | Dry-fried Green Beans             | 99        | Stir-fried Pumpkin Tips            |
| 100       | Stir-fried Taro                    | 101       | Vermicelli with Minced Meat       | 102       | Pan-fried Chicken Wings            |

Table 4. Food Name List from the OmniFood8K Dataset

| <b>ID</b> | <b>Name</b>                    | <b>ID</b> | <b>Name</b>                   | <b>ID</b> | <b>Name</b>                     |
|-----------|--------------------------------|-----------|-------------------------------|-----------|---------------------------------|
| 103       | Cold Kelp Knots                | 104       | Stir-fried Seafood Mushrooms  | 105       | Dried Bean Curd with Red Pepper |
| 106       | Dried Bean Curd with Meat      | 107       | Celery with Beef              | 108       | Pan-fried Ribs                  |
| 109       | Red Pepper Tofu Skin           | 110       | Fried Peanuts                 | 111       | Boiled Corn                     |
| 112       | Leek Fried Egg                 | 113       | Pan-fried Chicken Feet        | 114       | Pan-fried Chicken Drumstick     |
| 115       | Pan-fried White Fish           | 116       | Stir-fried White Beans        | 117       | Stir-fried Pumpkin Flower       |
| 118       | Stir-fried Bean Puff           | 119       | Stir-fried Aged Tofu          | 120       | Stir-fried Baby Bok Choy        |
| 121       | Stir-fried Pak Choi Tips       | 122       | Stir-fried Bracken with Meat  | 123       | Noodles                         |
| 124       | Stir-fried Fried Pork Skin     | 125       | Steamed Egg                   | 126       | Stir-fried Mushrooms            |
| 127       | Green Pepper Fried Veg Chicken | 128       | Stir-fried Pig Blood          | 129       | Celery with Shrimp              |
| 130       | Stir-fried Baby Cabbage        | 131       | Cold Kelp Shreds              | 132       | Stir-fried Kale                 |
| 133       | Green Pepper Dried Tofu        | 134       | Stir-fried Wood Ear           | 135       | Cold Sea Cabbage                |
| 136       | Konjac with Green Pepper       | 137       | Pan-fried Thousand-Layer Tofu | 138       | Shrimp with Egg                 |
| 139       | Stir-fried Crispy Pork         | 140       | Pan-fried Chicken Wing Tips   | 141       | Braised Fish                    |
| 142       | Plum                           | 143       | Peach                         | 144       | Red Plum                        |
| 145       | Apple                          | 146       | Pear                          | 147       | Banana                          |
| 148       | Dragon Fruit                   | 149       | Queen Mango                   | 150       | Fig                             |
| 151       | Watermelon                     | 152       | Kiwi                          | 153       | Passion Fruit                   |
| 154       | Jujube                         | 155       | Small Mango                   | 156       | Nectarine                       |
| 157       | Grape                          | 158       | Orange                        | 159       | Mandarin Orange                 |
| 160       | Blueberry                      | 161       | Cherry Tomato                 | 162       | Mangosteen                      |
| 163       | Longan                         | 164       | Purple Grape                  | 165       | Lychee                          |
